# Supplementary material for: Direct in vivo application of induced pluripotent stem cells is feasible and can be safe
Source: PubMed Central journal article supplement — Theranostics. 2019 Jan 1;9(1):290–310. doi: 10.7150/thno.28671 (PMC6332789; doi:10.7150/thno.28671), 2019-01-01
Supplement: thnov09p0290s1.pdf [file thnov09p0290s1.pdf]

# SUPPLEMENTAL INFORMATION

Supplemental information includes five figures and 1 table.

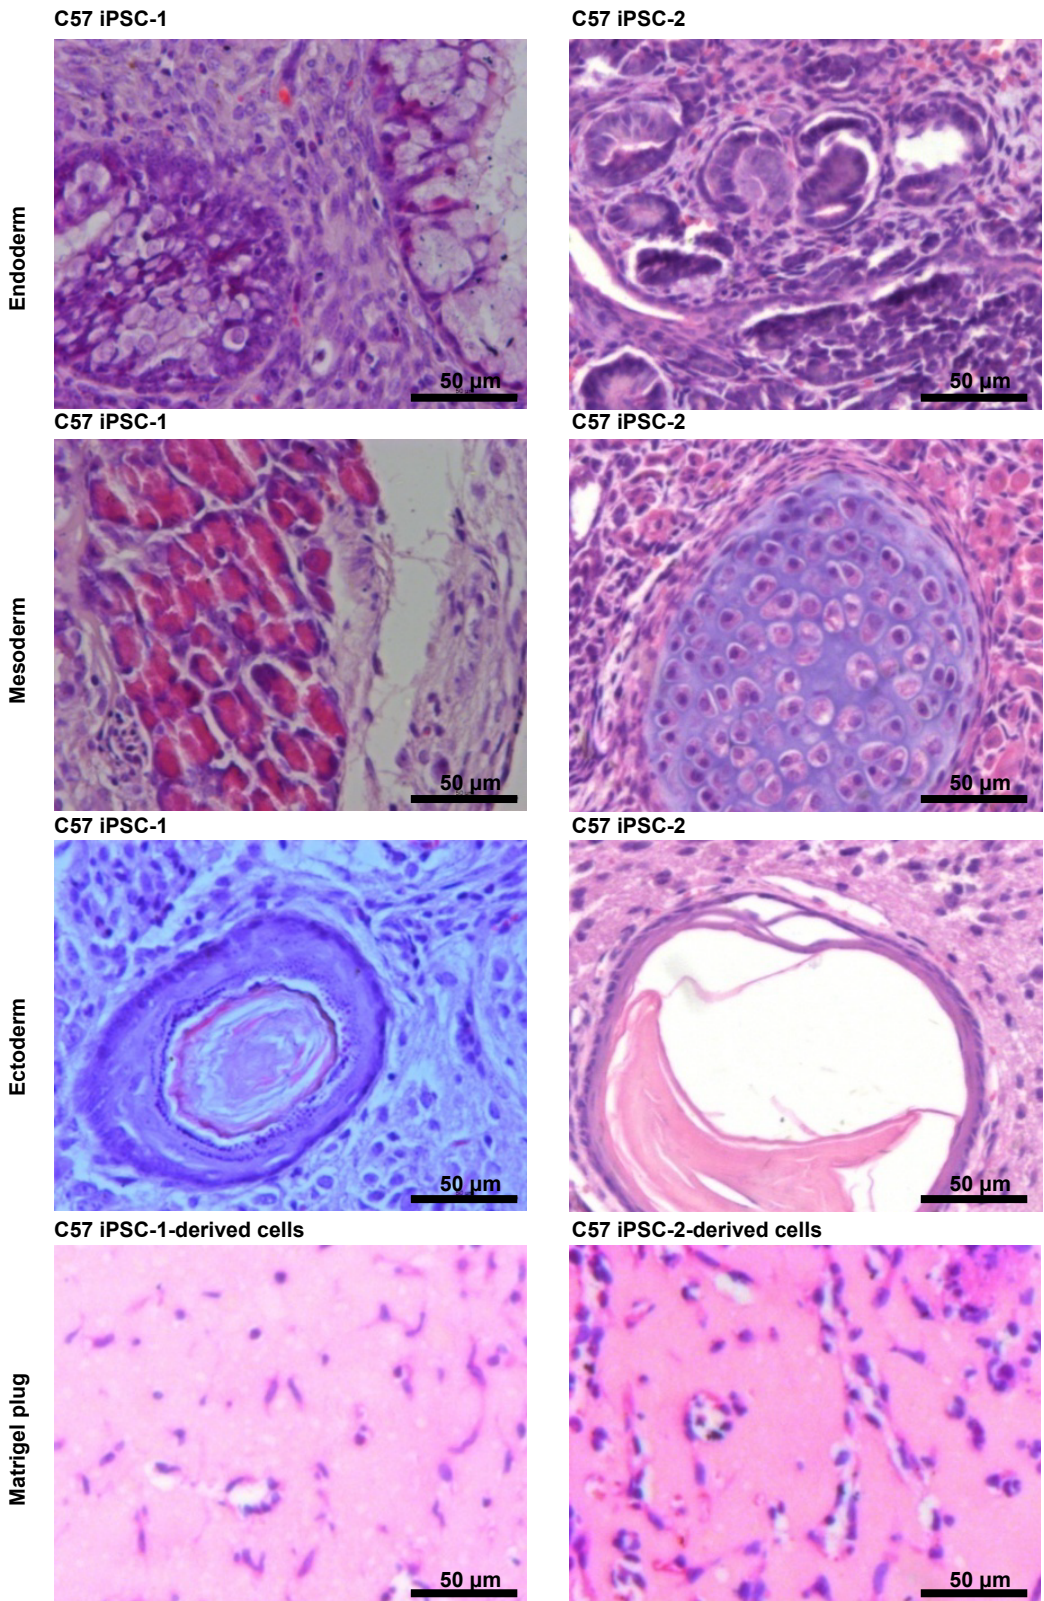

**Figure S1. Histological analyses of teratomas formed in syngeneic mice generated from subcutaneously injected mouse iPSCs.** The teratoma tissues were stained using hematoxylin and eosin to identify cells originating from the three germ layers (top three panels): endocrine glands (endoderm), muscle and cartilage (mesoderm), and epidermis (ectoderm). The lower panel shows the Matrigel plug harvested 28 days after subcutaneous injection of Matrigel-suspended mouse iPSC-derived cells.

A

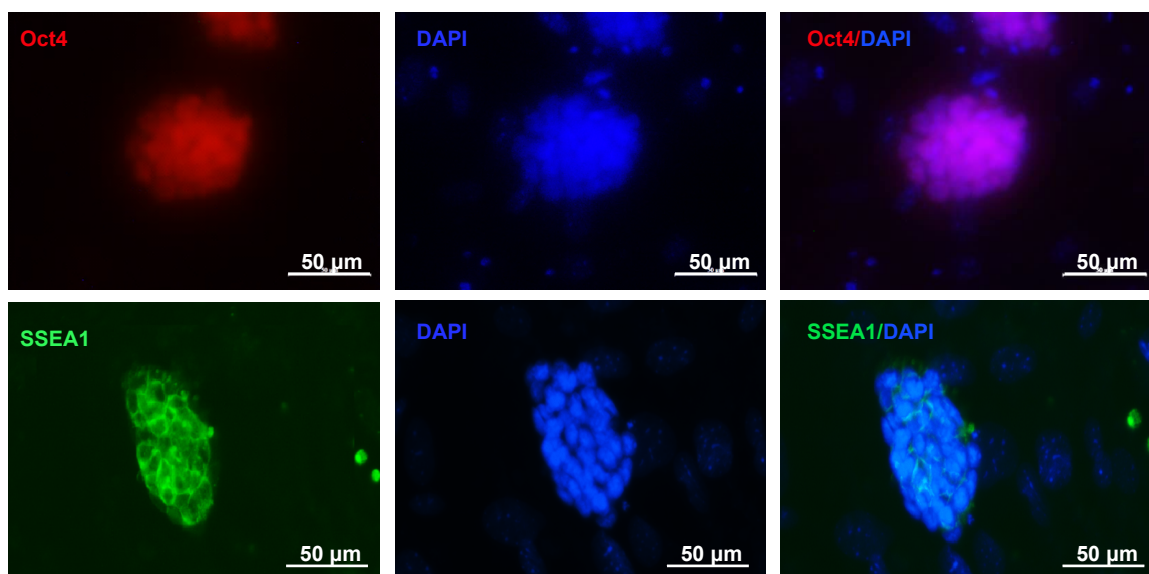

B

Alkaline phosphatase

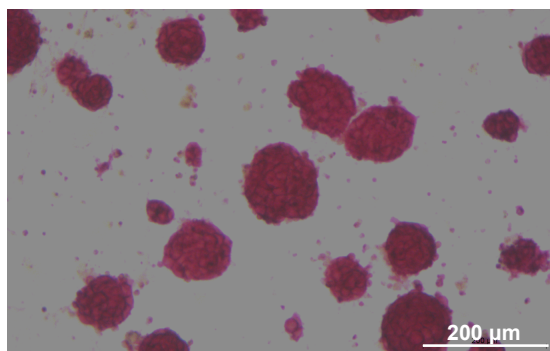

C

Embryoid body

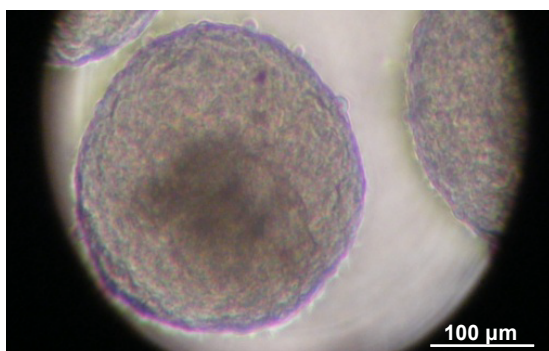

D

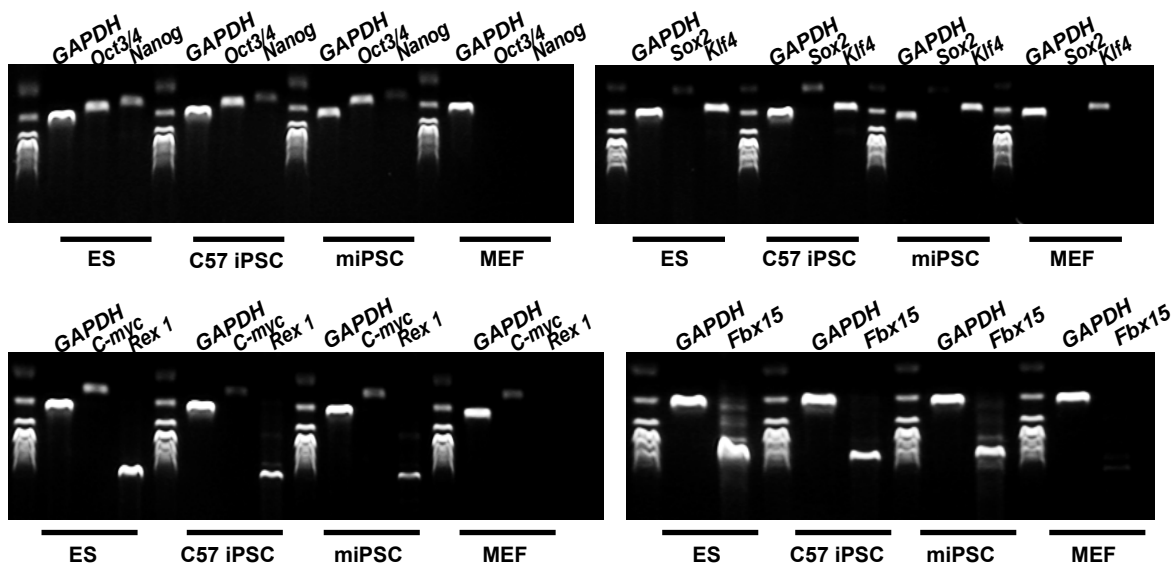

**Figure S2. Mouse iPSC identification.** (A) Expression of pluripotency markers in iPSCs. The cells were immunostained using specific antibodies for Oct4 and SSEA-1. Images were acquired using a fluorescence microscope. All iPSCs were strongly positive for both Oct4 and SSEA-1. (B) The cells possessed strong alkaline phosphatase activity. (C) The cells formed embryoid bodies when cultured in the absence of leukemia inhibitory factor. (D) The cells expressed pluripotency markers in a manner similar to embryonic stem cells.

**A**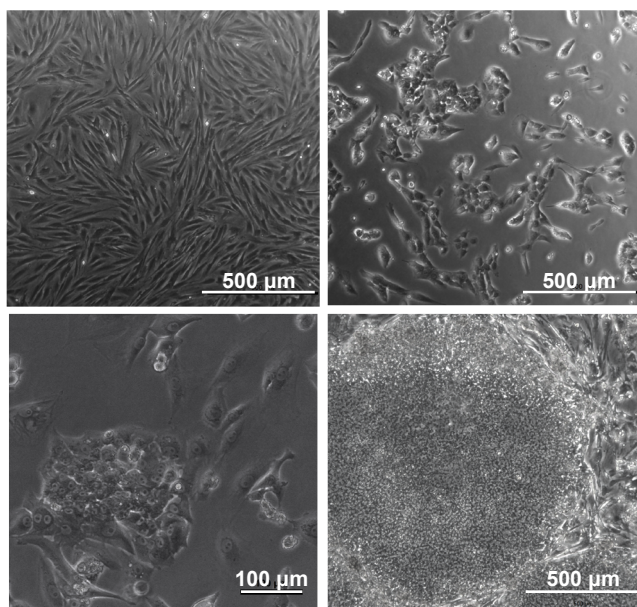**B**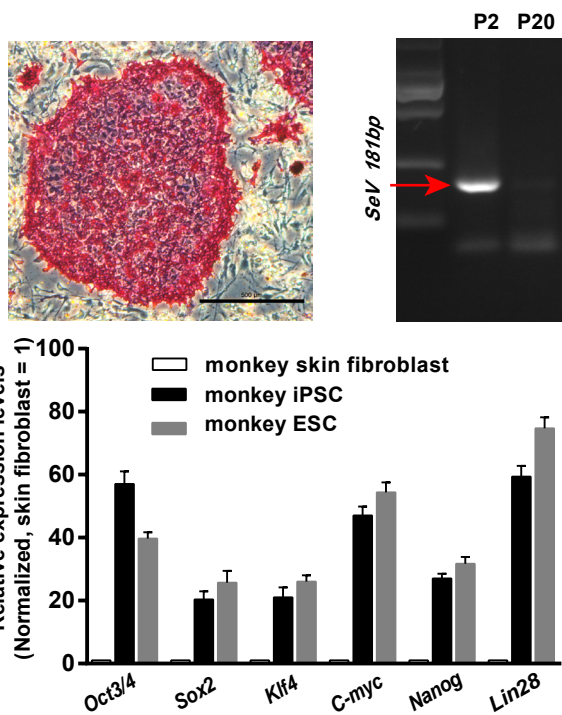**C**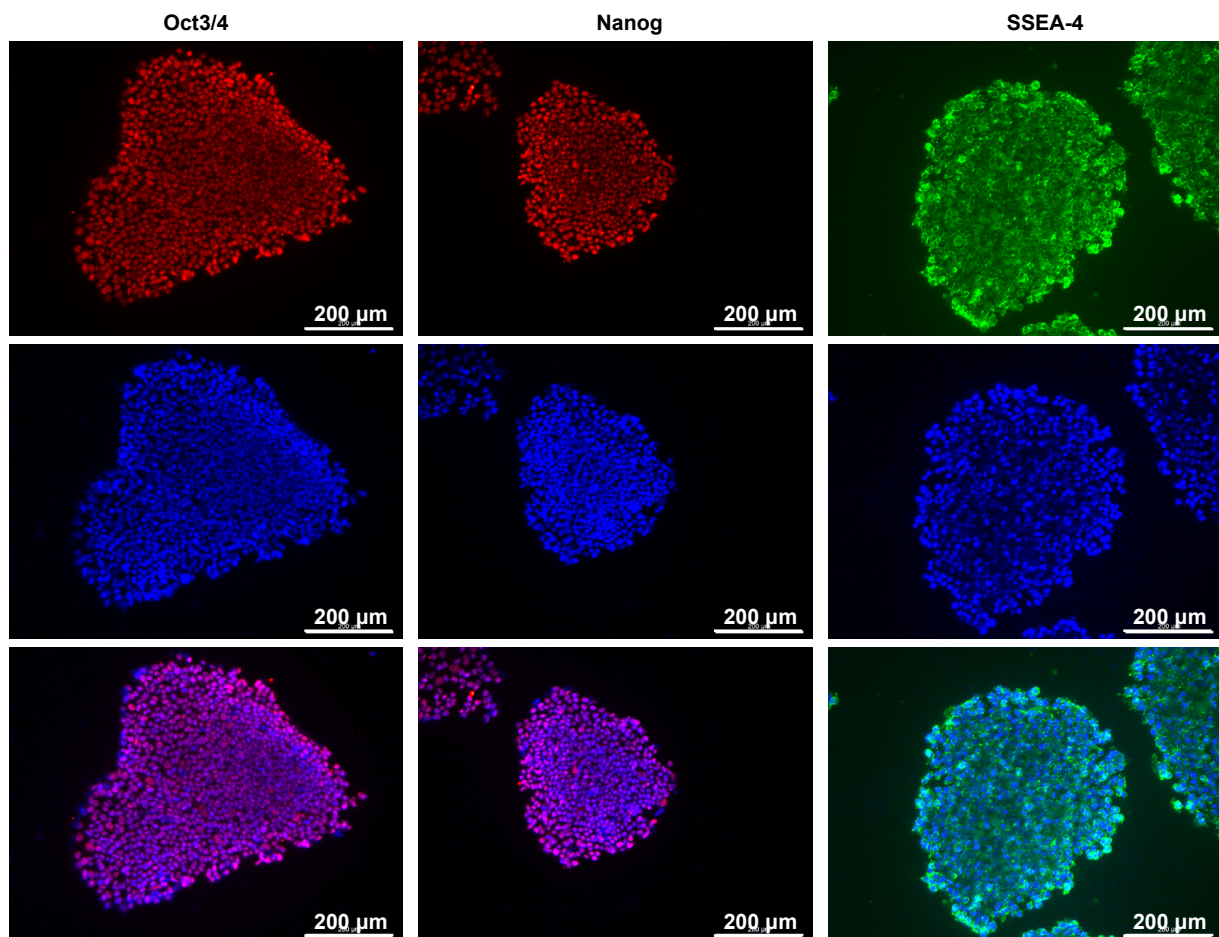

**D**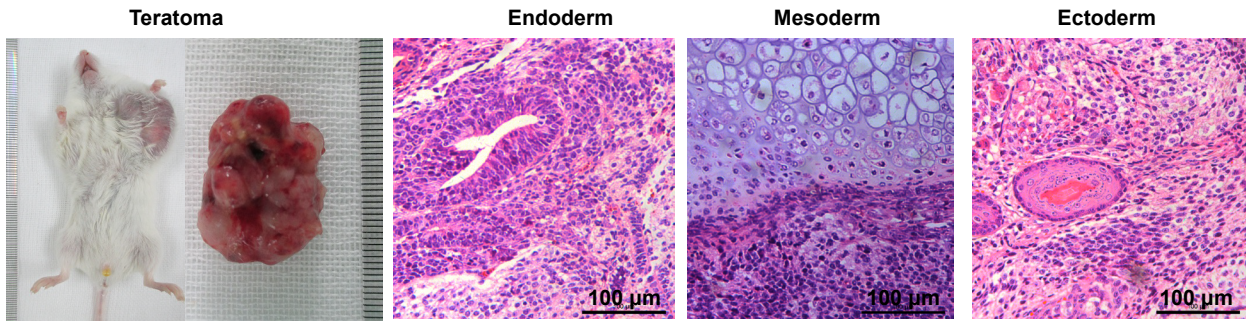**E**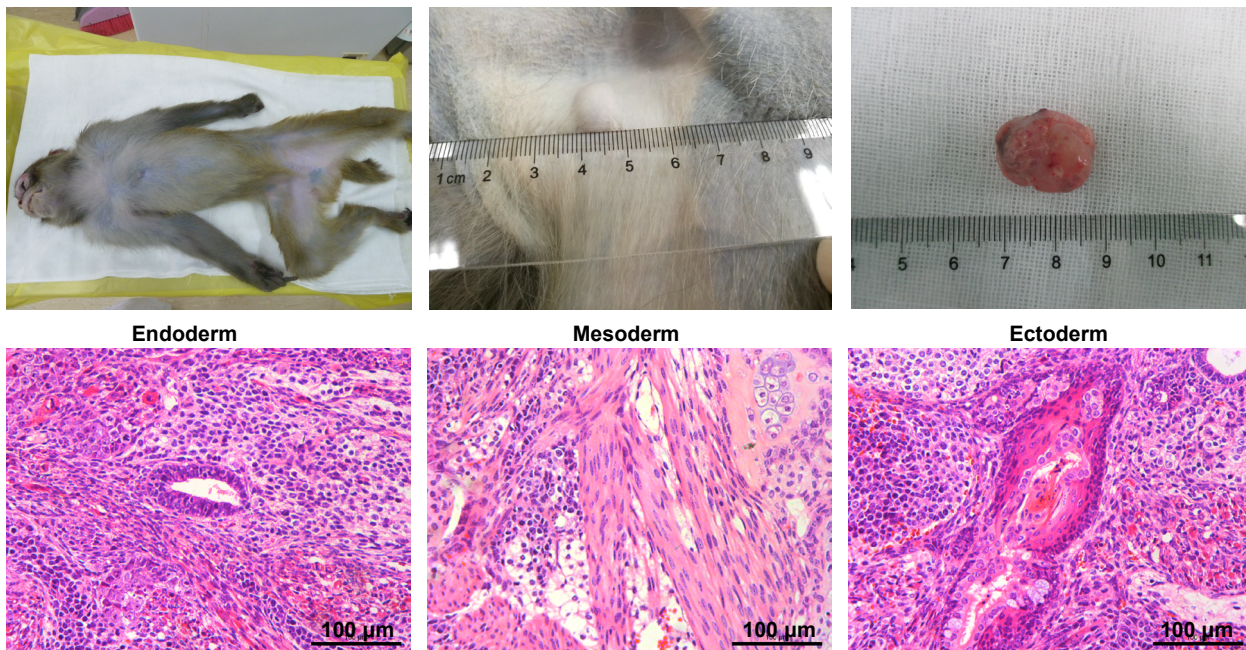**F**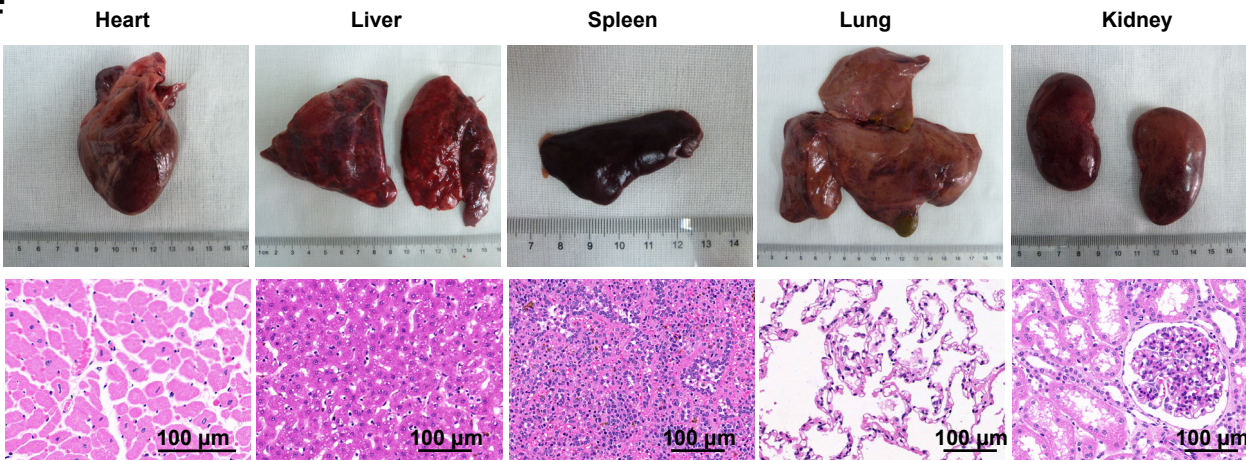

**Figure S3. Monkey iPSC identification.** (A) Cell morphology during induction. (B) The cells possessed strong alkaline phosphatase activity (left), and expression of pluripotency markers (middle) and marker of Sendai viral vector disappeared in iPSCs of 20th passage (right). (C) The cells were positively immunostained using specific antibodies for Oct3/4, Nanog, and SSEA-4. Images were acquired using a fluorescence microscope. (D) Histological analyses of teratomas formed in immune-deficient mice. (E) Autologous monkeys generated from subcutaneously injected iPSCs. The tissues were stained using H&E to identify cells originating from the three germ layers: endocrine glands (endoderm), muscle and cartilage (mesoderm), and epidermis (ectoderm). (F) Tissues outside the injection area of autologous iPSCs had no teratoma.

**A**

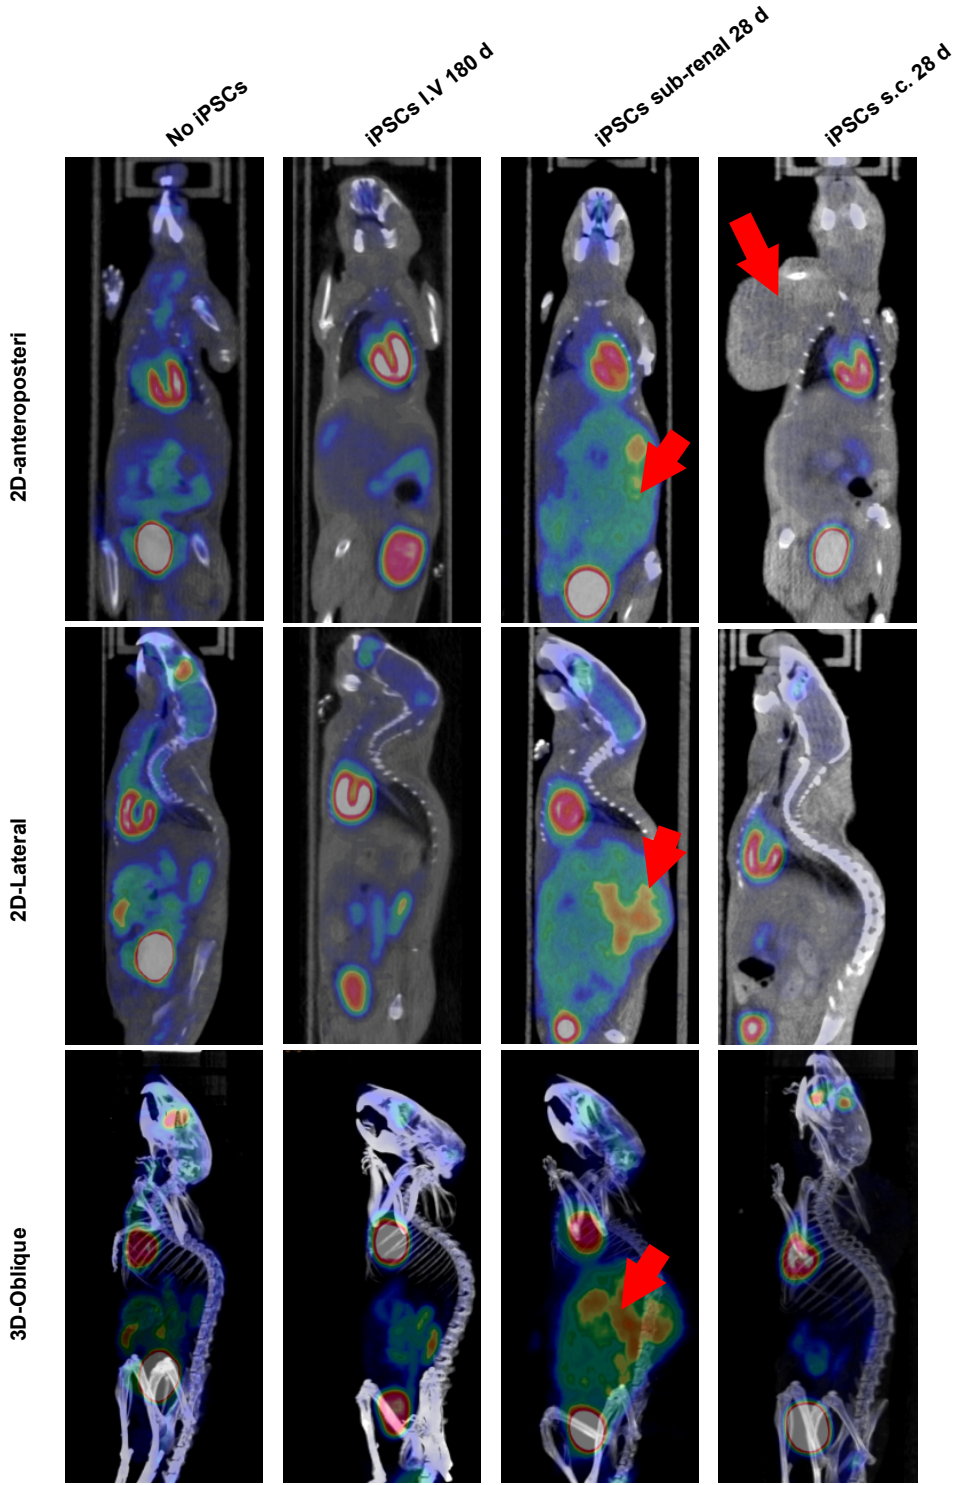

**B**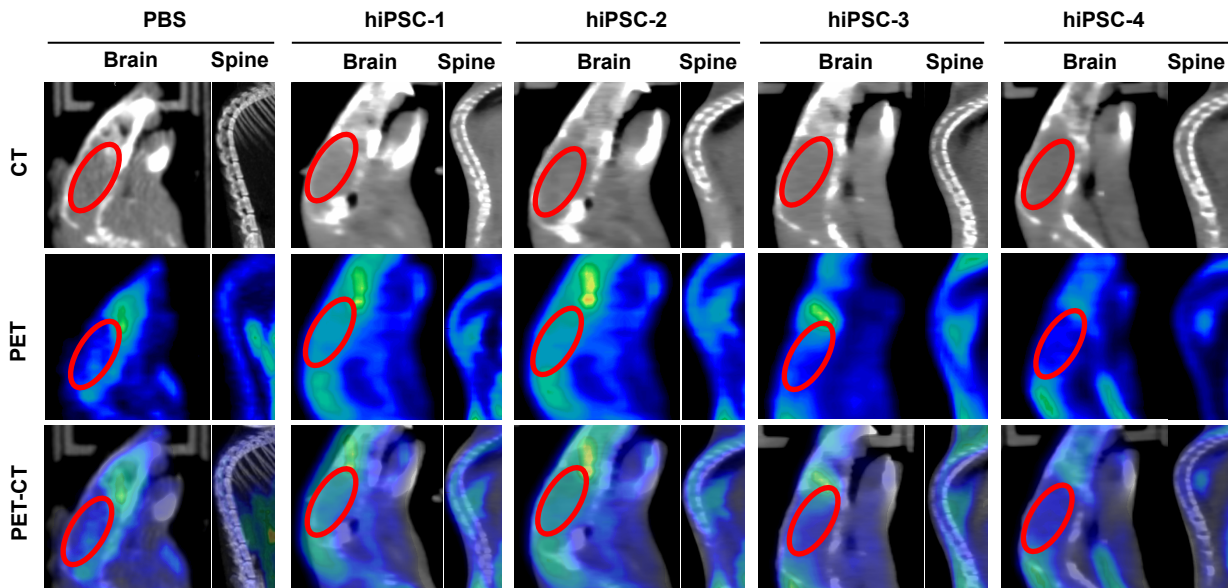

**Figure S4. Micro-PET/CT imaging for teratoma detection.** (A) 2D images of anteroposterior (top panel) and lateral (middle panel) positions and 3D images of the oblique position (bottom panel) are presented. Representative images of mice receiving no iPSCs, mice 180 days after bolus tail vein injection of  $2.5 \times 10^8$  iPSC/kg body weight, or mice 28 days after receiving  $1 \times 10^6$  iPSC/spot subcutaneously or  $1 \times 10^6$  cells in the intrarenal capsule are shown. Teratomas are indicated by red arrows. (B) Representative brain and spinal cord images of a NOD-SCID mouse without iPSC administration and four NOD-SCID mice receiving iPSC lines from four diabetic foot patients, captured 180 days after a bolus tail vein injection of  $2.5 \times 10^8$  iPSC / kg body weight. No teratoma was detected in the brain and spinal cord.

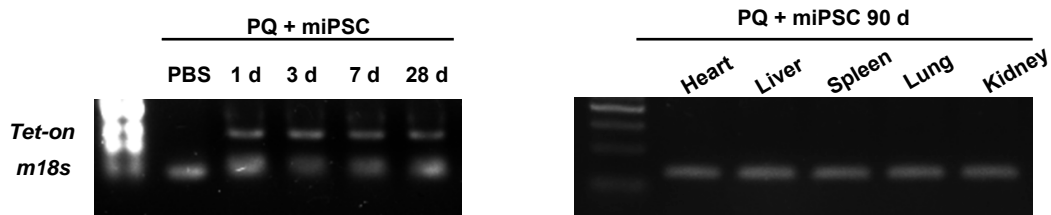

**Figure S5. Survival of intravenously injected syngeneic iPSCs in major organs of paraquat-intoxicated mice.** (A) PCR product from the *Tet-on* gene isolated from lungs of paraquat-intoxicated mice 1, 3, 7 and 28 days after intravenous iPSC injection. (B) Heart, liver, spleen, lung and kidney of paraquat-intoxicated mice 90 days after intravenous iPSC injection.

**Table S1. Key resources table**

| REAGENT or RESOURCE                                                 | SOURCE                        | IDENTIFIER       |
|---------------------------------------------------------------------|-------------------------------|------------------|
| <b>Antibodies</b>                                                   |                               |                  |
| Peroxidase AffiniPure Donkey anti-Rat IgG (H+L) (used at 1:5000)    | Jackson ImmunoResearch Inc    | Cat# 712-035-153 |
| Peroxidase AffiniPure Donkey anti-Mouse IgG (H+L) (used at 1:5000)  | Jackson ImmunoResearch Inc    | Cat# 715-035-151 |
| AffiniPure Fab Fragment Donkey anti-Mouse IgG(H+L) (used at 1:5000) | Jackson ImmunoResearch Inc    | Cat# 715-007-003 |
| Mouse monoclonal anti-Oct3/4 antibody (used at 1:200)               | Santa Cruz Biotechnology      | Cat# sc-101534   |
| Mouse monoclonal anti-SSEA1 (MC480) antibody (used at 1:100)        | Cellular Signaling Technology | Cat# 4744        |
| Rabbit polyclonal anti-Nanog antibody (used at 1:100)               | abcam                         | Cat# ab80892     |
| Rabbit polyclonal anti-Sox2 antibody (used at 1:100)                | abcam                         | Cat# ab97959     |
| Mouse monoclonal anti-Tra1-60 antibody (used at 1:100)              | abcam                         | Cat# ab16288     |
| Mouse monoclonal anti-SSEA4 Antibody (used at 1:100)                | Thermo Fisher Scientific      | Cat# MA1-021     |
| Mouse monoclonal anti-SSEA4 Antibody (used at 1:100)                | abcam                         | Cat#ab16287      |
| Mouse monoclonal antibody STEM 121                                  | Takara Bio Inc                | Cat#Y40410       |
| <b>Bacterial and Virus Strains</b>                                  |                               |                  |
| Sendai virus                                                        | Thermo Fisher Scientific      | Cat# A16518      |
| <b>Chemicals, Peptides, and Recombinant Proteins</b>                |                               |                  |
| Lipofectamine 2000                                                  | Thermo Fisher Scientific      | Cat#11668019     |
| Dulbecco's modified Eagle's medium                                  | Thermo Fisher Scientific      | Cat#11965175     |
| DMEM/F12                                                            | Thermo Fisher Scientific      | Cat# 10565018    |
| Fetal bovine serum ,FBS                                             | Thermo Fisher Scientific      | Cat#10100147     |
| Polybrene                                                           | Sigma-Aldrich                 | Cat#107689-10G   |
| $\beta$ -mercaptoethanol                                            | Sigma-Aldrich                 | Cat#97622-10ML   |
| Penicillin-Streptomycin-Glutamine                                   | Thermo Fisher Scientific      | Cat#10378016     |
| Doxycycline                                                         | Sigma-Aldrich                 | Cat#D9891-1G     |
| Leukemia inhibitory factor                                          | Millipore                     | Cat#LIF2005      |
| Ficoll-Paque PREMIUM                                                | GE Healthcare                 | Cat#17-1440-02   |
| Serum-free medium                                                   | Nobimpex                      | Cat#N101-0500    |
| Knockout serum replacement, KSR                                     | Thermo Fisher Scientific      | Cat#10828028     |
| L-glutamine                                                         | Thermo Fisher Scientific      | Cat#25030081     |
| Non-essential amino acids, NEAA                                     | Thermo Fisher Scientific      | Cat#11140050     |
| Basic fibroblast growth factor, bFGF                                | Thermo Fisher Scientific      | Cat#PHG0266      |



|                                                                                                                                             |                                                  |                |
|---------------------------------------------------------------------------------------------------------------------------------------------|--------------------------------------------------|----------------|
| Matrigel                                                                                                                                    | BD Biosciences                                   | Cat#354277     |
| 6'-diamidino-2-phenylindole, DAPI                                                                                                           | Sigma-Aldrich                                    | Cat#D8417      |
| Donkey serum                                                                                                                                | Sigma-Aldrich                                    | Cat#D9663      |
| Triton X-100                                                                                                                                | Sigma-Aldrich                                    | Cat#T9284      |
| Valproic acid                                                                                                                               | Sigma-Aldrich                                    | Cat#PHR1061    |
| Alkaline phosphatase detection kit                                                                                                          | Sigma-Aldrich                                    | Cat#86R-1KT    |
| SYBR Green PCR Master Mix                                                                                                                   | Thermo Fisher Scientific                         | Cat#4309155    |
| TRIzol Reagent                                                                                                                              | Thermo Fisher Scientific                         | Cat#15596026   |
| SuperScript III                                                                                                                             | Thermo Fisher Scientific                         | Cat#18080044   |
| EC growth medium, ECM                                                                                                                       | ScienCell Research Laboratories                  | Cat#1001       |
| Mitomycin C                                                                                                                                 | Sigma                                            | Cat#M0503      |
| Paraformaldehyde                                                                                                                            | Sinopharm chemical reagent Co, Ltd               | Cat#30525-89-4 |
| LPS                                                                                                                                         | Sigma-Aldrich                                    | Cat#L2880-10MG |
| Pentobarbital sodium                                                                                                                        | Sigma-Aldrich                                    | Cat#P3761      |
| Collagenase IV                                                                                                                              | Thermo Fisher Scientific                         | Cat#17104019   |
| Trypsin-EDTA                                                                                                                                | Thermo Fisher Scientific                         | Cat#25200056   |
| Streptozotocin                                                                                                                              | Sigma-Aldrich                                    | Cat#S0130-50MG |
| Low melting point agarose                                                                                                                   | Biowest                                          | Cat#111860     |
| Paraquat dichloride hydrate                                                                                                                 | Sigma-Aldrich                                    | Cat#36541      |
| Carbon Tetrachloride                                                                                                                        | Sinopharm chemical reagent Co, Ltd               | Cat#10006428   |
| Recombinant Anti-human CD3 monoclonal antibody                                                                                              | T&L Biological Technology                        | Cat# TL-101    |
| Recombinant human Interleukin-2                                                                                                             | T&L Biological Technology                        | Cat# TL-104    |
| Experimental Models: Cell Lines                                                                                                             |                                                  |                |
| 293FT                                                                                                                                       | ATCC                                             | ATCC PTA-5077  |
| Experimental Models: Organisms/Strains                                                                                                      |                                                  |                |
| Mouse: C57BL/6                                                                                                                              | Shanghai Laboratory Animal Co. Ltd               |                |
| Mouse: SCID-NOD                                                                                                                             | Vital River Laboratory Animal Technology Co. Ltd |                |
| Monkey: macaque                                                                                                                             | Dongwu Experimental Monkey Farm                  |                |
| Oligonucleotides                                                                                                                            |                                                  |                |
| Primer:<br><b>Macaque</b><br><b>Oct3/4(Genbank:NM_001114955.1)</b><br>Forward:<br>CAGATCAGCCACATTGCCAG<br>Reverse:<br>CAAAGCCCTGGCACAAACTCT | This paper                                       | N/A            |

|                                                                                                                                                   |            |     |
|---------------------------------------------------------------------------------------------------------------------------------------------------|------------|-----|
| Primer:<br><b>Macaque</b><br><b>Sox2(Genbank:NM_001142940.1)</b><br>Forward:<br>GGTTACCTCTTCCTCCCACTCC<br>Reverse:<br>CCTCCCATTTCCCTCGTTTT        | This paper | N/A |
| Primer:<br><b>Macaque</b><br><b>Klf4(Genbank:NM_001142793.2)</b><br>Forward:<br>TTTTCGGTTTTGGCTTCGTTTC<br>Reverse:<br>GTCCAGGTCCAGGAGATCGTTG      | This paper | N/A |
| Primer:<br><b>Macaque</b><br><b>c-Myc(Genbank:NM_001142873.1)</b><br>Forward<br>GCGTCGTGGGAAGGGAGATAC<br>Reverse:<br>CACCGAGTCGTAGTCGAGGTCAT<br>A | This paper | N/A |
| Primer:<br><b>Macaque</b><br><b>Nanog(Genbank:XM_001112791.3)</b><br>Forward<br>CCTATGCCTGTGATTTGTGGG<br>Reverse<br>AGGTTGTTTGCCTTTGGGAC          | This paper | N/A |
| Primer:<br><b>Macaque</b><br><b>Lin28(ENSMMUG00000044953)</b><br>Forward:<br>GTTCGGCTTCCTGTCCAT<br>Reverse:<br>CACTCCCAATACAGAACACCC              | This paper | N/A |
| Primer:<br><b>Macaque</b><br><b>GAPDH(Genbank:NM_001195426.1)</b><br>Forward:<br>GGTGTGAACCATGAGAAGTATGA<br>Reverse:<br>GAGTCCTTCCACGATACCAAAG    | This paper | N/A |

|                                                                                                                                          |            |     |
|------------------------------------------------------------------------------------------------------------------------------------------|------------|-----|
| Primer: Tet-On Forward:<br>AGCACAACTACGCCGCACCC<br>Tet-On Reverse:<br>TGCACCAGAGTTTCGAAGC-                                               | This paper | N/A |
| Primer:<br><b>human</b><br><b>Oct3/4(Genbank:NM_001173531.2)</b><br>Forward:<br>CGAGAAGGATGTGGTCCGAG<br>Reverse:<br>GAGACAGGGGGAAAGGCTTC | This paper | N/A |
| Primer:<br><b>human</b><br><b>Sox2(Genbank:NM_003106.3)</b><br>Forward:<br>CCCCTGTGGTTACCTCTTCC<br>Reverse:<br>CCTCCCATTTCCCTCGTTTT      | This paper | N/A |
| Primer:<br><b>human</b><br><b>Klf4(Genbank:NM_001314052.1)</b><br>Forward:<br>CCGCTCCATTACCAAGAGC<br>Reverse:<br>TTTCTCACCTGTGTGGGTTTC   | This paper | N/A |
| Primer:<br><b>human</b><br><b>c-Myc(Genbank:NM_001354870.1)</b><br>Forward<br>CAGCGACTCTGAGGAGGAAC<br>Reverse:<br>GCTGGTGCATTTTCGGTTGT   | This paper | N/A |
| Primer:<br><b>human</b><br><b>Nanog (Genbank:NM_001297698.1)</b><br>Forward<br>CAATGGTGTGACGCAGAAGG<br>Reverse<br>TGCACCAGGTCTGAGTGTTTC  | This paper | N/A |

|                                                                                                                                          |            |     |
|------------------------------------------------------------------------------------------------------------------------------------------|------------|-----|
| Primer:<br><b>human</b><br><b>GAPDH(Genbank:NM_001256799.2)</b><br>Forward:<br>GATTCCACCCATGGCAAATC<br>Reverse:<br>CTGGAAGATGGTGATGGGATT | This paper | N/A |
| Primer:<br><b>mouse</b><br><b>Oct3/4(Genbank:NM_001252452.1)</b><br>Forward:<br>GCATACGAGTTCTGCGGAGG<br>Reverse:<br>TCTCCAACTTCACGGCATTG | This paper | N/A |
| Primer:<br><b>mouse</b><br><b>Sox2(Genbank:NM_011443.4)</b><br>Forward:<br>CAGGAGAACCCCAAGATG<br>Reverse:<br>GTGTACTIONTATCCTTCTTC       | This paper | N/A |
| Primer:<br><b>mouse</b><br><b>Klf4(Genbank:NM_010637.3)</b><br>Forward:<br>GCAGTCACAAGTCCCCTCTC<br>Reverse:<br>CTGTGTGAGTTCGCAGGTGT      | This paper | N/A |
| Primer:<br><b>mouse</b><br><b>c-Myc(Genbank:NM_001177352.1)</b><br>Forward<br>CAACGTCTTGGAACGTCAGA<br>Reverse:<br>CTCGTCTGCTTGAATGGACA   | This paper | N/A |
| Primer:<br><b>mouse</b><br><b>Nanog (Genbank:NM_001289828.1)</b><br>Forward<br>GGAACGCCTCATCAATGC<br>Reverse<br>TTTGTTTGGGACTGGTAGAAG    | This paper | N/A |

|                                                                                                                                       |            |            |
|---------------------------------------------------------------------------------------------------------------------------------------|------------|------------|
| Primer:<br><b>mouse</b><br><b>Rex1(Genbank:NM_025852.3)</b><br>Forward<br>GCCAGCAGCTCCTGCACACA<br>Reverse<br>TGAGCTCGCCCCAACCTCA      | This paper | N/A        |
| Primer:<br><b>mouse</b><br><b>Fbx15(Genbank:NM_015798.4)</b><br>Forward<br>GGTGGGGCTGTGGCAGGAGA<br>Reverse<br>AGAGTAAGCCGGCTGCGGGA    | This paper | N/A        |
| Primer:<br><b>mouse</b><br><b>GAPDH(Genbank:NM_001289726.1)</b><br>Forward<br>CTCATGACCACAGTCCATGC<br>Reverse<br>TTCAGCTCTGGGATGACCTT | This paper | N/A        |
| Recombinant DNA                                                                                                                       |            |            |
| FUW-OSKM                                                                                                                              | Addgene    | Cat #20328 |
| psPAX2                                                                                                                                | Addgene    | Cat #12260 |
| pMD2.G                                                                                                                                | addgene    | Cat #12259 |
| Other                                                                                                                                 |            |            |
| 4-mm biopunch                                                                                                                         | FRAY       | CE0413     |
| 0.015-inch-diameter Straight Fixed<br>Core Wire Guide C-SF-15-156                                                                     | Cook       | Cat#G02426 |
